# Supplementary material for: Distribution and Clinicopathological Features of Mott Cells (Plasma Cells Containing Russell Bodies) in Gastric Cancer: Presence of Mott Cells Is Associated with Favorable Prognosis
Source: MDPI journal article supplement (doi:10.3390/jcm13030658), 2024-01-23
Supplement: s1 [file s1]

## Supplementary Materials

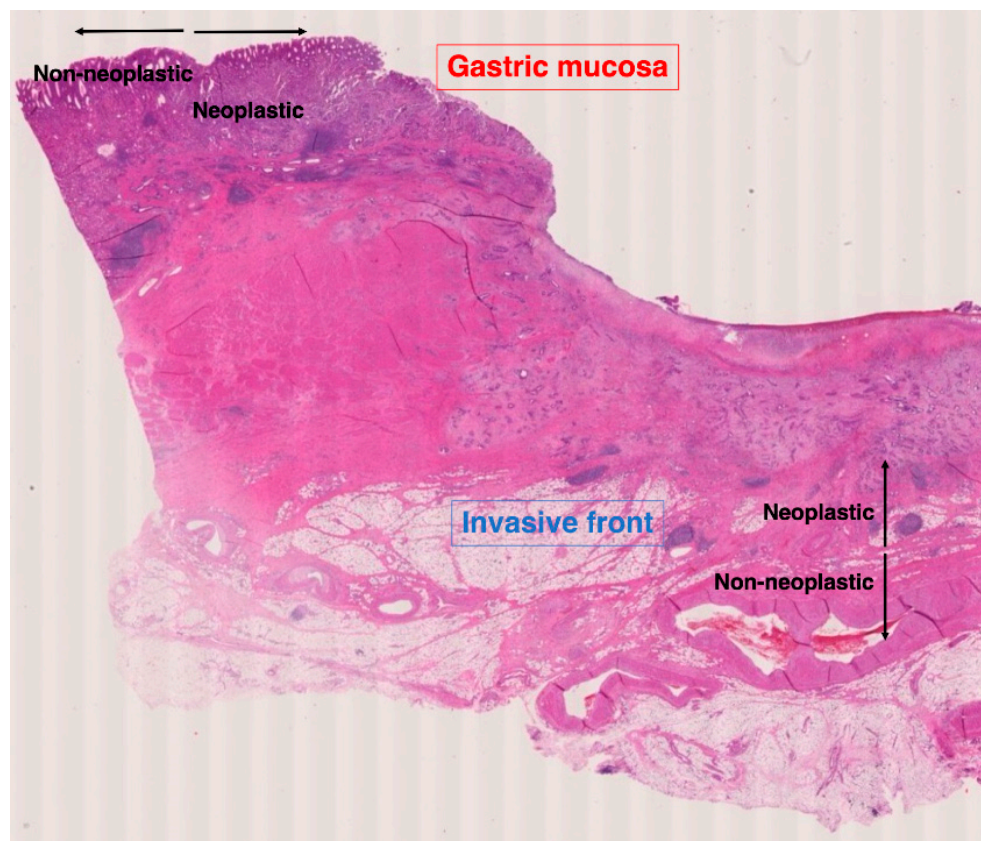

**Figure S1.** Four areas (non-neoplastic gastric mucosa, neoplastic mucosa, neoplastic invasive front, and non-neoplastic stroma) for evaluating inflammatory cells on HE slides of GC tissues.

**Table S1.** Information on antibodies used in this study and their rates of positivity.

| Antibody | Clone   | Dilution | Source                    | Cutoff-point      | Positivity (%) |
|----------|---------|----------|---------------------------|-------------------|----------------|
| PD-L1    | E1L3N   | 1: 200   | Cell Signaling Technology | 5%≤               | 18/116 (16%)   |
| MLH1     | ES05    | 1: 50    | DAKO                      | Loss or reduction | 26/116 (10%)   |
| MSH2     | FE11    | 1: 50    | DAKO                      | Loss or reduction | 5/116 (4%)     |
| HER2     | SV2-61γ | Diluted  | Nichirei                  | 2+, 3+            | 25/116 (23%)   |
| EGFR     | 2-18C9  | Diluted  | DAKO                      | 10%≤              | 29/116 (19%)   |
| c-MET    | SP44    | Diluted  | Ventana Medical Systems   | 2+, 3+            | 20/116 (19%)   |
| CD44     | DF1485  | 1: 50    | Novocastra                | 10%≤              | 54/116 (45%)   |
| ALDH1    | 44/ALDH | 1: 200   | BD Biosciences            | 10%≤              | 71/116 (63%)   |
| CD133    | AC133   | 1: 100   | Miltenyi Biotec           | 10%≤              | 20/116 (17%)   |
| p53      | DO-7    | 1: 50    | Novocastra                | 50%≤              | 45/116 (21%)   |

**Table S2.** Relationship between high or low presence of blood cells and clinicopathological parameters in the neoplastic area of gastric mucosa.

|        | Eosinophils |     |        | Neutrophils |     |        | Lymphocytes |     |         | Plasma cells |     |        |
|--------|-------------|-----|--------|-------------|-----|--------|-------------|-----|---------|--------------|-----|--------|
|        | High        | Low | P      | High        | low | P      | High        | low | P       | High         | low | P      |
| Age    |             |     |        |             |     |        |             |     |         |              |     |        |
| <65    | 69 (61%)    | 44  | 0.0081 | 56 (50%)    | 57  | 1.0000 | 54 (48%)    | 59  | 0.02889 | 52 (46%)     | 61  | 1.0000 |
| >65    | 50 (42%)    | 66  |        | 57 (49%)    | 59  |        | 47 (41%)    | 69  |         | 53 (46%)     | 63  |        |
| Sex    |             |     |        |             |     |        |             |     |         |              |     |        |
| Female | 57 (55%)    | 47  | 0.5067 | 57 (55%)    | 47  | 0.1455 | 53 (51%)    | 51  | 0.0623  | 48 (46%)     | 56  | 1.0000 |
| Man    | 62 (50%)    | 63  |        | 56 (45%)    | 69  |        | 48 (38%)    | 77  |         | 57 (46%)     | 68  |        |

|             |          |    |               |          |    |                |          |    |               |          |    |               |
|-------------|----------|----|---------------|----------|----|----------------|----------|----|---------------|----------|----|---------------|
| Histology   |          |    |               |          |    |                |          |    |               |          |    |               |
| tub/pap     | 62 (53%) | 55 | 0.8947        | 63 (54%) | 54 | 0.1848         | 44 (38%) | 73 | <b>0.0335</b> | 57 (49%) | 60 | 0.4242        |
| por/sig     | 57 (52%) | 53 |               | 49 (45%) | 61 |                | 57 (52%) | 53 |               | 47 (43%) | 63 |               |
| T grade     |          |    |               |          |    |                |          |    |               |          |    |               |
| Tis/T1      | 64 (67%) | 32 | <b>0.0002</b> | 51 (53%) | 45 | 0.3309         | 37 (39%) | 59 | 0.1777        | 53 (55%) | 43 | <b>0.0221</b> |
| T2/3/4      | 55 (41%) | 78 |               | 62 (47%) | 71 |                | 64 (48%) | 69 |               | 52 (39%) | 81 |               |
| N grade     |          |    |               |          |    |                |          |    |               |          |    |               |
| N0          | 69 (56%) | 55 | 0.2854        | 67 (54%) | 57 | 0.1105         | 53 (43%) | 71 | 0.5910        | 58 (47%) | 66 | 0.8934        |
| N1/2/3      | 49 (48%) | 53 |               | 44 (43%) | 58 |                | 48 (47%) | 54 |               | 46 (45%) | 56 |               |
| Stage       |          |    |               |          |    |                |          |    |               |          |    |               |
| Stage 0/1   | 70 (60%) | 47 | <b>0.0174</b> | 66 (56%) | 51 | <b>0.00345</b> | 46 (39%) | 71 | 0.1452        | 51 (52%) | 56 | 0.0633        |
| Stage 2/3/4 | 49 (44%) | 63 |               | 47 (42%) | 65 |                | 55 (49%) | 57 |               | 44 (39%) | 68 |               |

*p* values were calculated using Fisher's exact test.  
Bold values indicate statistical significance ( $p < 0.05$ )

**Table S3.** Relationship between high or low presence of blood cells and clinicopathological parameters in the neoplastic area of the invasive front.

|             | Eosinophils |     |               | Neutrophils |     |               | Lymphocytes |     |          | Plasma cells |     |               |
|-------------|-------------|-----|---------------|-------------|-----|---------------|-------------|-----|----------|--------------|-----|---------------|
|             | High (%)    | Low | <i>P</i>      | High        | low | <i>P</i>      | High        | low | <i>P</i> | High         | Low | <i>P</i>      |
| Age         |             |     |               |             |     |               |             |     |          |              |     |               |
| <65         | 34 (45%)    | 42  | 1.0000        | 32 (42%)    | 44  | 0.2745        | 36 (47%)    | 40  | 0.4333   | 29 (38%)     | 47  | 0.3424        |
| >65         | 39 (44%)    | 49  |               | 45 (51%)    | 43  |               | 36 (41%)    | 52  |          | 41 (47%)     | 47  |               |
| Sex         |             |     |               |             |     |               |             |     |          |              |     |               |
| Female      | 36 (47%)    | 40  | 0.5309        | 36 (47%)    | 40  | 1.0000        | 37 (49%)    | 39  | 0.2725   | 29 (38%)     | 47  | 0.3424        |
| Man         | 37 (42%)    | 51  |               | 41 (47%)    | 47  |               | 35 (40%)    | 53  |          | 41 (47%)     | 47  |               |
| Histology   |             |     |               |             |     |               |             |     |          |              |     |               |
| tub/pap     | 38 (38%)    | 41  | 0.4341        | 47 (59%)    | 32  | <b>0.0029</b> | 28 (35%)    | 51  | 0.0576   | 39 (49%)     | 40  | 0.0837        |
| por/sig     | 35 (42%)    | 49  |               | 30 (36%)    | 54  |               | 43 (52%)    | 41  |          | 30 (36%)     | 54  |               |
| T grade     |             |     |               |             |     |               |             |     |          |              |     |               |
| Tis/T1      | 24 (63%)    | 14  | <b>0.0096</b> | 51 (53%)    | 45  | 0.3309        | 18 (43%)    | 20  | 0.7100   | 22 (58%)     | 16  | <b>0.0395</b> |
| T2/3/4      | 49 (39%)    | 77  |               | 62 (47%)    | 71  |               | 54 (43%)    | 72  |          | 48 (38%)     | 78  |               |
| N grade     |             |     |               |             |     |               |             |     |          |              |     |               |
| N0          | 31 (48%)    | 34  | 0.6324        | 33 (51%)    | 32  | 0.5207        | 33 (51%)    | 32  | 0.1961   | 31 (48%)     | 34  | 0.4196        |
| N1/2/3      | 42 (44%)    | 54  |               | 43 (45%)    | 53  |               | 38 (40%)    | 58  |          | 39 (41%)     | 57  |               |
| Stage       |             |     |               |             |     |               |             |     |          |              |     |               |
| Stage 0/1   | 33 (58%)    | 24  | <b>0.0137</b> | 28 (49%)    | 29  | 0.7435        | 28 (49%)    | 29  | 0.4089   | 31 (54%)     | 26  | <b>0.0318</b> |
| Stage 2/3/4 | 40 (37%)    | 67  |               | 49 (46%)    | 58  |               | 44 (41%)    | 63  |          | 39 (36%)     | 68  |               |

*p* values were calculated using Fisher's exact test.  
Bold values indicate statistical significance ( $p < 0.05$ )

**Table S4.** Relationship between presence of Mott cells in non-neoplastic gastric mucosa and clinicopathological characteristics.

|              | Mott cell          |                     | <i>p</i> value |
|--------------|--------------------|---------------------|----------------|
|              | Existence<br>n=203 | Non-existence n=351 |                |
| Age          |                    |                     |                |
| < 65 (n=274) | 106 (39%)          | 168                 | 0.3234         |
| ≥ 65 (n=280) | 97 (35%)           | 183                 |                |
| Sex          |                    |                     |                |
| Male (n=352) | 120 (34%)          | 232                 | 0.0999         |

|                           |                           |           |     |               |
|---------------------------|---------------------------|-----------|-----|---------------|
| Histologic classification | Female (n=202)            | 83 (41%)  | 119 | 0.4254        |
|                           | Differentiated (n=307)    | 108 (35%) | 199 |               |
| <b>T classification</b>   | Un-differentiated (n=247) | 95 (38%)  | 95  | <b>0.0005</b> |
|                           | <b>T1</b> (n=293)         | 127 (43%) | 166 |               |
| N classification          | T2/T3/T4 (n=261)          | 76 (29%)  | 185 | 0.1316        |
|                           | N0 (n=357)                | 139 (38%) | 218 |               |
| <b>Stage</b>              | N1/N2/N3 (n=197)          | 64 (32%)  | 133 | <b>0.0435</b> |
|                           | <b>I</b> (n=352)          | 140 (40%) | 212 |               |
| <b>H. pylori</b>          | II/III/IV (n=202)         | 63 (31%)  | 139 | <b>0.0002</b> |
|                           | Negative (n=454)          | 150 (33%) | 304 |               |
|                           | <b>Positive</b> (n=100)   | 53 (53%)  | 47  |               |

*p* values were calculated using Fisher's exact test.

Bold values indicate statistical significance ( $p < 0.05$ )
